# Supplementary material for: Charging dynamics of angstrom-scale pores of MXene electrode with ionic liquid electrolytes
Source: Royal Society of Chemistry journal article supplement (doi:10.1039/d5fd00151j), 2026-01-01
Supplement: d5fd00151j1.pdf [file d5fd00151j1.pdf]

## Supplementary Information

### **Charging dynamics of angstrom-scale pores of MXene electrode with ionic liquid electrolytes**

Ming Chen<sup>a)</sup>, Ostoja-Petkowski Sebastian<sup>a)</sup>, Alexei A. Kornyshev<sup>a)\*</sup>

*<sup>a)</sup> Department of Chemistry, Faculty of Natural Sciences, Imperial College, Molecular Sciences Research Hub, White City Campus, London, Wood Lane | W12 0BZ | UK*

\*Correspondence to:

Alexei A. Kornyshev: a.kornyshev@imperial.ac.uk

#### Content

- I. Charging dynamics in pores of different sizes (Figs. S1-4)**
- II. Free-ion content in a sample pore (Fig. S5)**

## I. Charging dynamics in pores of different sizes

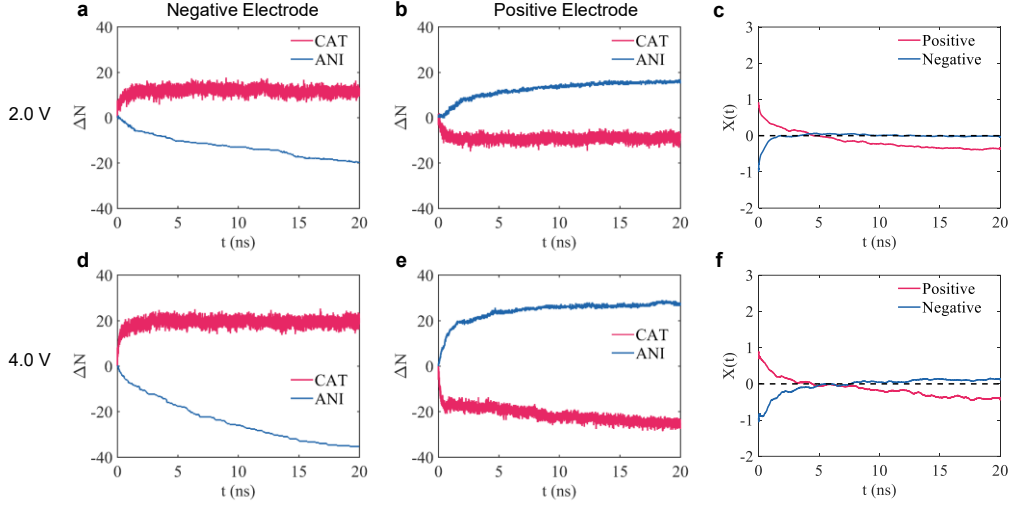

**Figure S1. Charging mechanisms in 0.7 nm MXene pore.** (a,b) Time evolution of the ion number difference,  $\Delta N$ , in the negatively charged (a) and positively charged (b) pores under an applied cell voltage of 2 V. (c) Time Evolution of the voltage-dependent charging parameter  $X(t)$  under an applied cell voltage of 2 V. (d,e) Evolution of  $\Delta N$  in the negatively charged (d) and positively charged (e) pores under an applied cell voltage of 4 V. (f) Time Evolution of the voltage-dependent charging parameter  $X(t)$  under an applied cell voltage of 4 V.

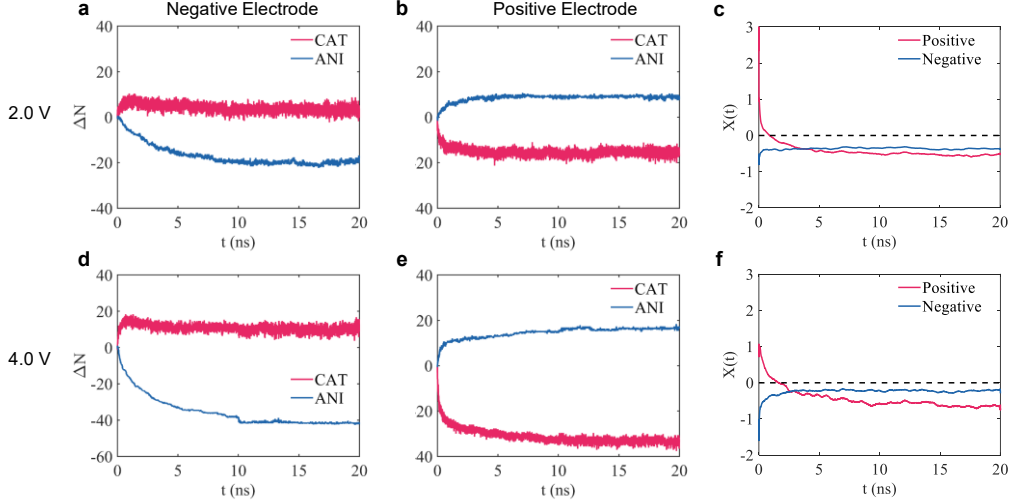

**Figure S2. Charging mechanisms in 0.8 nm MXene pore.** (a,b) Time evolution of the ion number difference,  $\Delta N$ , in the negatively charged (a) and positively charged (b) pores under an applied cell voltage of 2 V. (c) Time Evolution of the voltage-dependent charging parameter  $X(t)$  under an applied cell voltage of 2 V. (d,e) Evolution of  $\Delta N$  in the negatively charged (d) and positively charged (e) pores under an applied cell voltage of 4 V. (f) Time Evolution of the voltage-dependent charging parameter  $X(t)$  under an applied cell voltage of 4 V.

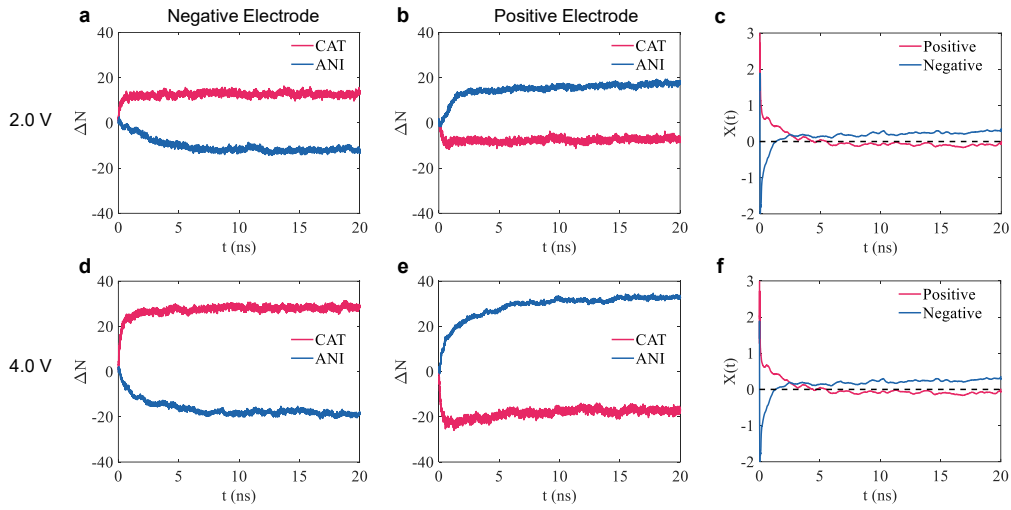

**Figure S3. Charging mechanisms in 1.0 nm MXene pore. (a,b)** Time evolution of the ion number difference,  $\Delta N$ , in the negatively charged (a) and positively charged (b) pores under an applied cell voltage of 2 V. (c) Time Evolution of the voltage-dependent charging parameter  $X(t)$  under an applied cell voltage of 2 V. (d,e) Evolution of  $\Delta N$  in the negatively charged (d) and positively charged (e) pores under an applied cell voltage of 4 V. (f) Time Evolution of the voltage-dependent charging parameter  $X(t)$  under an applied cell voltage of 4 V.

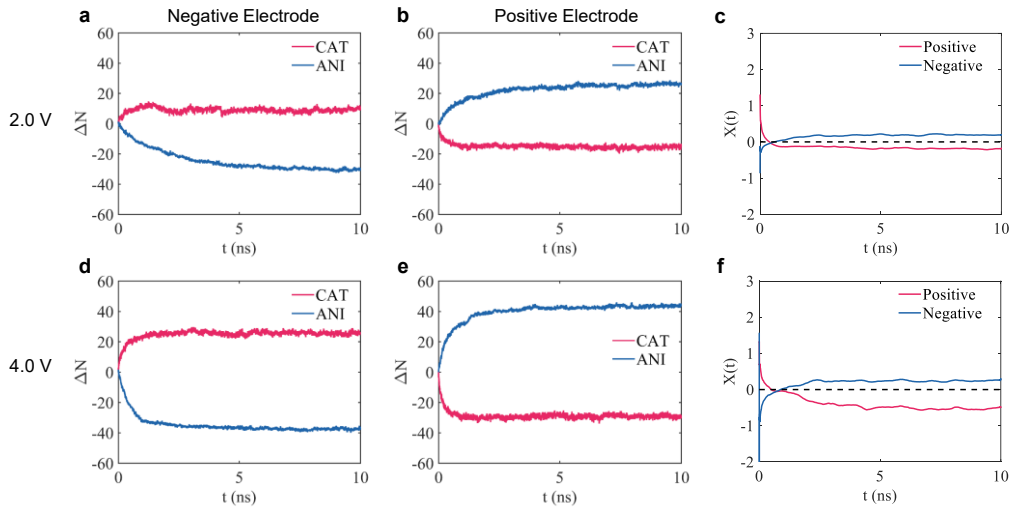

**Figure S4. Charging mechanisms in 1.2 nm MXene pore. (a,b)** Time evolution of the ion number difference,  $\Delta N$ , in the negatively charged (a) and positively charged (b) pores under an applied cell voltage of 2 V. (c) Time Evolution of the voltage-dependent charging parameter  $X(t)$  under an applied cell voltage of 2 V. (d,e) Evolution of  $\Delta N$  in the negatively charged (d) and positively charged (e) pores under an applied cell voltage of 4 V. (f) Time Evolution of the voltage-dependent charging parameter  $X(t)$  under an applied cell voltage of 4 V.

## II. Free-ion content in a sample pore

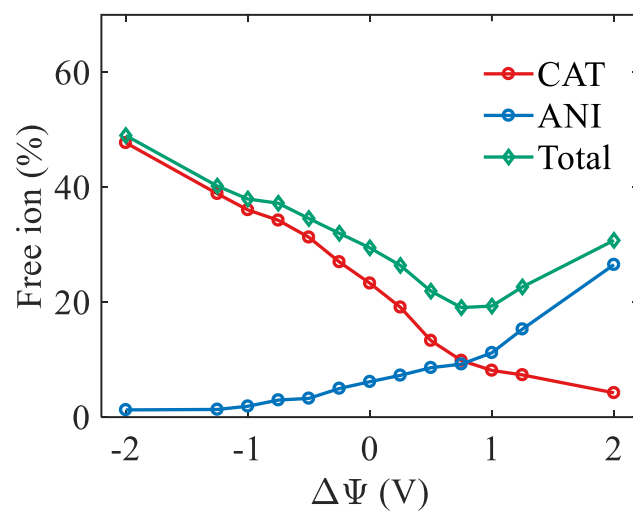

**Figure S5. Voltage-dependent proportion of free cations and anions inside of a 1.0 nm-size MXene pore as a function of its polarisation.**
